# Supplementary material
Source: PubMed Central journal article supplement (PMC1691170)
Supplement: 12495495s01.pdf [file 12495495s01.pdf]

These are electronic appendices to the paper by Proulx *et al.* 2002 Older males signal more reliably. *Proc. R. Soc. Lond. B* 269, 2291—2299.

Electronic appendices are refereed with the text. However, no attempt is made to impose a uniform editorial style on the electronic appendices.

### Appendix A The Proportional Reduction in Survivorship Interpretation of the Handicap Criterion

As described in the text, the handicap criterion for semelparous species can be stated as as

$$\frac{\partial^2 s(q, a)}{\partial a \partial q} - \frac{\frac{\partial s(q, a)}{\partial a} \frac{\partial s(q, a)}{\partial q}}{s(q, a)} > 0. \quad (1)$$

This is equivalent to the statement that  $\frac{\frac{\partial s(q, a)}{\partial a}}{s(q, a)}$  is an increasing function of  $q$ . This is a local condition about the costs of signalling relative to the level of survivorship. Now we note that if this is true for all values of  $a$  then for two values of  $q$ ,  $q_1 > q_2$  we have

$$\frac{\frac{\partial s(q_1, a)}{\partial a}}{s(q_1, a)} > \frac{\frac{\partial s(q_2, a)}{\partial a}}{s(q_2, a)}. \quad (2)$$

We can obtain a measure of the cumulative effect of this difference by integrating over all lower signaling levels to define

$$P_i(a) = \int_0^a \frac{\frac{\partial s(q_i, y)}{\partial a}}{s(q_i, y)} dy. \quad (3)$$

Because the integrand is everywhere increasing in  $q$ , the integral is also, giving  $P_1(a) > P_2(a)$ . Now we note that  $P_i(a) = \ln(s(q_i, a)/s(q_i, 0))$ , and since the log function is an increasing function it must be the case that

$$\frac{s(q_1, a)}{s(q_1, 0)} > \frac{s(q_2, a)}{s(q_2, 0)}. \quad (4)$$

Thus, when the handicap criterion is met for all relevant signalling levels, the proportional reduction in survivorship for a given advertising level will be greater for low quality males.

### Appendix B: Reproductive Value Decreases with Age

Williams (1966) first suggested that the effort put into current reproductive success should increase as individuals age. For our model we make a few simplifying assumptions which make it possible to determine how future success (reproductive value) changes with male age. We assume that a maximum age  $T$  limits the lifespan and that age specific (but quality independent) survivorship decreases with age. Thus, the reproductive values of a male in the last and second to last age class are

$$w_T = s(q, A(q, T))M(A(q, T)) \quad (5)$$

$$w_{T-1} = s(q, A(q, T-1))M(A(q, T-1)) + p_{T-1}s(q, A(q, T-1))s(q, A(q, T))M(A(q, T)), \quad (6)$$

where  $A(q, t)$  is the optimal signalling level for a male with quality  $q$  at age  $t$  and  $p_x = 1 - \mu_x$  is the quality independent probability of surviving from age  $x$  to  $x+1$ . We wish to show that  $w_{T-1} > w_T$ . First note that at age  $T$  a male will act to maximize fitness so that the choice of  $a = A(q, T)$  maximizes  $s(q, a) \times M(a)$ .

We can see that  $w_{T-1} > w_T$  by noting that if the choice  $a = A(q, T-1) = A(q, T)$  were made then

$$w_{T-1} = s(q, A(q, T))M(A(q, T))(p_{T-1}s(q, A(q, T)) + 1) > s(q, A(q, T))M(A(q, T)) = w_T. \quad (7)$$

So even if males use the same signalling strategy at  $T-1$  as at time  $T$  then  $w_{T-1} > w_T$ , so the optimal choice for  $A(q, T-1)$  must yield greater fitness, and  $w_{T-1} > w_T$ .

We also wish to show that for this life history  $w_{t-1} > w_t$  for all ages. We have already established that  $w_{t-1} > w_t$  and can use induction to prove our result. By assumption we have  $p_{t-1} > p_t$ , i.e. senescence acts to lower survival rates as individuals age. Now we show that if  $w_t > w_{t+1}$  then  $w_{t-1} > w_t$ . The reproductive values at ages  $t$  and  $t-1$  are

$$w_t = s(q, A(q, t))M(A(q, t)) + p_t s(q, A(q, t))w_{t+1} \quad (8)$$

$$w_{t-1} = s(q, A(q, t-1))M(A(q, t-1)) + p_{t-1} s(q, A(q, t-1))w_t. \quad (9)$$

Now we can again ask what the value of  $w_{t-1}$  is when we let  $A(q, t-1) = A(q, t)$ .

$$w_{t-1} = s(q, A(q, t))M(A(q, t)) + p_{t-1} s(q, A(q, t))w_t, \quad (10)$$

and because both  $p_{t-1} > p_t$  and  $w_t > w_{t+1}$  this term is greater than  $w_t$ . The optimal choice of  $A(q, t-1)$  must not decrease, so  $w_{t-1} > w_t$ . Thus,  $w_t$  is a decreasing function of age.

## References

Williams, G. C. 1966. *Adaptation and Natural Selection: A critique of some current evolutionary thought*. Princeton University Press, Princeton, New Jersey.
